# Supplementary material
Source: publisher figshare collection journal article supplement (https://tandf.figshare.com/ndownloader/files/14514689)
Supplement: Supplementary file 1 [file 14514689]

Appendix C. Quantitative distribution of various palynomorphs categories encountered within the Abu Roash "A" Member, BED 2-3 well. The total number of species is a sum of all the species of marine and terrestrial palynomorphs identified, excluding MFTLs.

| **Lithology** | | **Abo Roash A Member** | | | | | | | | | | | | | | | | | | | | | | | | | | | | | | |
| --- | --- | --- | --- | --- | --- | --- | --- | --- | --- | --- | --- | --- | --- | --- | --- | --- | --- | --- | --- | --- | --- | --- | --- | --- | --- | --- | --- | --- | --- | --- | --- | --- |
| **Species / Sample Depth** | | **1570** | **1576** | **1582** | **1588** | **1594** | **1600** | **1606** | **1612** | **1618** | **1624** | **1630** | **1636** | **1642** | **1648** | **1654** | **1660** | **1666** | **1672** | **1678** | **1684** | **1690** | **1696** | **1702** | **1708** | **1714** | **1720** | **1726** | **1732** | **1738** | **1744** | **1750** |
| **Dinoflagellate cysts** | ***Achomosphaera Alcicornu*** |  |  |  |  |  |  |  |  |  |  |  |  |  |  |  | 1 |  |  | 1 | 1 |  |  |  |  |  |  |  |  |  |  |  |
| ***Achomosphaera ramulifera*** | 3 | 6 | 1 |  |  | 1 | 1 | 1 |  |  |  |  |  |  |  |  |  |  |  | 4 |  |  |  |  |  |  | 1 |  | 1 | 1 |  |
| ***Alterbia? distincta*** |  |  |  |  |  |  |  |  |  |  |  |  |  |  |  |  |  |  |  |  | 1 |  |  |  |  |  |  |  |  |  |  |
| ***Alterbia* sp.** |  |  |  |  |  |  |  |  |  |  |  |  |  |  |  |  |  |  |  |  |  |  |  |  |  | 1 |  |  |  |  |  |
| ***Alterbidinium acutulum*** |  |  |  |  | 1 |  |  |  |  |  |  |  |  |  | 1 |  |  |  |  |  |  |  |  |  |  |  |  |  |  |  |  |
| ***Alterbidinium distinctum*** |  |  |  |  |  |  |  |  |  |  |  |  |  |  |  |  |  | 1 |  |  |  |  |  |  |  |  |  |  |  |  |  |
| ***Alterbidinium varium*** |  |  |  |  |  |  |  | 1 |  |  |  |  |  |  |  |  |  |  |  |  |  | 1 | 1 |  |  | 1 |  |  |  |  |  |
| ***Alterbidinium* sp.** | 2 | 1 | 1 | 2 |  | 1 | 3 |  |  |  |  |  |  |  |  |  |  |  |  |  |  |  | 1 |  |  |  | 1 |  | 2 |  |  |
| ***Aptea* cf*. anaphrissa*** |  |  |  |  |  |  |  |  |  |  |  |  |  |  |  |  |  |  |  |  |  |  | 1 |  |  |  |  |  |  |  |  |
| ***Apteodinium* *deflandrei*** | 1 |  | 1 |  |  |  |  |  |  |  |  |  |  |  |  | 1 |  |  | 1 | 1 |  |  |  |  |  |  |  |  | 2 |  |  |
| ***Apteodinium* cf. *deflandrei*** |  |  |  |  |  |  |  |  |  |  |  |  |  | 1 |  |  |  |  |  |  |  |  |  |  |  |  |  |  |  |  |  |
| ***Apteodinium* sp.** |  |  | 1 |  |  |  |  |  |  |  |  |  |  |  |  |  |  | 1 |  |  | 1 | 1 | 1 |  |  |  |  |  |  | 1 |  |
| ***Balteocysta perforare*** |  |  |  |  |  |  |  |  | 1 |  |  |  |  |  |  |  |  |  |  |  |  |  |  |  | 1 |  |  |  |  |  |  |
| ***Batiacasphaera reticulata*** |  | 1 | 2 |  | 1 |  |  | 3 | 1 | 2 | 1 | 3 | 5 | 2 | 1 |  | 1 | 4 | 5 | 1 |  |  |  |  |  |  |  | 1 |  | 1 |  |
| ***Batiacasphaera rugulata*** |  |  |  |  |  |  |  |  |  |  | 1 |  |  |  |  |  |  |  |  |  |  | 1 |  |  |  |  |  |  |  |  |  |
| ***Batiacasphaera subtilis*** |  |  |  |  |  |  |  |  |  |  |  |  |  |  |  |  |  |  |  |  |  |  | 1 |  |  |  |  |  |  |  |  |
| ***Batiacasphaera* sp*.*** |  | 4 | 4 |  | 2 |  | 6 |  | 1 | 2 | 2 | 2 | 5 | 3 | 2 | 5 | 4 |  | 2 | 2 | 6 | 3 | 3 | 1 |  | 2 | 4 | 3 | 3 | 5 |  |
| ***Bourkidinium* sp.** |  |  |  |  |  |  |  |  |  |  |  |  | 1 |  |  |  |  |  |  |  |  |  |  |  |  |  |  |  |  |  |  |
| ***Bosedinia alveolata*** |  | 2 | 2 | 1 |  | 6 | 9 | 1 | 6 | 5 | 2 | 4 | 3 | 1 |  |  | 2 | 2 | 2 | 4 | 1 | 3 | 1 | 8 | 3 | 1 | 3 | 2 | 6 | 2 |  |
| ***Bosedinia laevigata*** | 3 | 1 | 6 | 2 | 3 | 7 | 8 | 3 | 9 | 8 | 1 | 1 | 5 | 6 | 4 | 2 | 1 | 6 | 1 | 6 | 2 | 3 | 8 | 9 | 6 | 3 | 7 | 2 | 4 | 2 |  |
| ***Bosedinia spinosa*** | 3 | 1 | 1 |  |  | 2 |  | 2 | 1 |  |  |  |  | 2 |  | 2 | 1 | 1 | 2 | 6 |  | 4 | 7 | 5 | 5 | 9 | 4 | 6 | 4 | 4 |  |
| ***Canningia reticulata*** | 2 | 6 | 4 |  | 5 | 4 | 1 | 3 | 1 | 7 | 6 | 9 | 6 | 6 |  | 3 | 9 | 5 | 9 | 2 | 3 |  | 4 | 2 | 4 | 4 |  | 4 | 7 | 5 | 2 |
| ***Cauca parva*** | 1 |  |  |  |  |  |  |  |  |  |  |  |  | 1 |  |  |  |  |  |  |  |  |  |  |  |  |  |  |  |  |  |
| ***Sepispinula? huguoniotii*** |  |  |  |  |  |  | 1 |  |  |  |  | 3 | 2 | 1 |  |  |  |  |  |  |  |  |  |  |  |  |  |  |  | 1 |  |
| ***Chatangiella niiga*** |  |  |  |  |  |  |  |  |  |  |  |  |  |  |  |  |  |  |  |  |  |  |  | 2 |  |  |  |  |  |  |  |
| ***Chatangiella williamsii*** | 3 | 9 | 9 | 3 | 6 | 1 |  |  | 1 |  |  |  |  |  |  |  |  | 1 |  |  |  |  |  |  |  |  |  |  |  |  |  |
| ***Chatangiella* sp*.*** | 2 | 9 | 6 | 1 |  |  | 2 |  | 2 | 1 |  |  |  |  |  |  |  |  |  |  |  |  |  |  |  |  |  |  |  |  |  |
| ***Chytroeisphaeridia chytroeides*** |  |  | 2 |  |  | 1 | 3 |  | 1 | 1 |  |  | 2 | 2 | 3 |  |  | 2 |  | 3 |  |  | 2 | 3 |  |  | 2 | 2 | 1 | 1 |  |
| ***Circulodinium* cf. *distinctum*** | 3 | 5 | 9 | 2 | 1 | 4 |  | 4 | 9 | 4 | 2 | 6 | 6 | 8 | 3 | 6 | 9 | 2 | 5 | 9 | 6 | 5 | 2 | 4 | 3 | 1 | 2 | 5 | 4 | 9 | 5 |
| ***Coronifera oceanica*** |  | 1 | 1 | 1 | 1 | 4 | 1 | 1 |  | 1 |  | 3 | 2 |  | 2 | 1 |  | 2 | 1 | 3 | 2 | 1 | 1 | 1 | 7 | 5 | 6 | 5 | 3 |  |  |
| ***Cribroperidinium edwardsii*** |  |  |  | 1 |  |  |  |  | 1 |  | 1 |  |  | 1 |  |  | 1 |  |  |  |  |  |  |  |  |  |  |  |  |  |  |
| ***Cribroperidinium exilicristatum*** | 1 |  | 2 | 1 | 8 |  |  |  |  | 1 |  |  |  |  |  | 1 |  | 1 |  |  |  | 2 |  | 2 |  |  |  |  |  |  |  |
| ***Cribroperidinium* sp*.*** | 1 |  | 1 | 1 | 2 |  |  |  |  |  | 1 |  |  |  |  |  | 2 |  |  | 1 |  |  |  |  |  |  | 2 | 1 |  |  |  |
| ***Cyclonephelium brevispinatum*** |  |  |  |  |  |  |  |  |  | 1 |  | 5 |  | 2 | 2 |  | 3 |  | 3 |  |  |  |  |  |  |  |  |  | 1 | 1 |  |
| ***Cyclonephelium compactum*** |  |  | 1 |  |  | 2 |  | 1 | 3 | 3 | 3 | 7 |  | 2 | 1 |  |  |  |  | 6 |  |  |  |  |  | 3 | 1 |  | 1 |  |  |
| ***Cyclonephelium filoreticulatum*** |  |  |  |  |  |  |  |  |  |  |  |  |  |  |  |  | 3 |  | 3 |  |  | 1 |  |  |  | 1 | 1 |  |  |  |  |
| ***Cyclonephelium vannophorum*** |  |  |  |  |  |  |  |  |  | 1 |  |  |  |  | 1 |  |  |  | 1 | 1 |  |  | 2 | 2 |  |  |  |  |  |  |  |
| ***Cyclonephelium* sp.** |  |  |  |  |  |  |  |  |  |  | 1 | 3 | 2 |  | 3 | 1 |  |  |  | 1 |  |  |  | 4 |  |  |  |  |  |  |  |
| ***Deflandrea cygniformis*** |  |  | 1 |  |  |  |  |  |  |  |  |  |  |  |  |  | 1 |  | 1 |  |  |  |  |  |  |  |  |  |  |  |  |
| ***Deflandrea* sp.** |  |  |  |  |  | 1 |  |  |  |  |  | 1 |  |  |  |  |  |  |  |  |  |  |  |  | 1 | 2 |  |  |  |  |  |
| ***Dinogymnium acuminatum*** |  |  |  |  |  |  |  | 1 | 1 |  |  |  |  | 2 |  |  |  |  |  |  |  |  |  |  |  |  |  |  |  |  |  |
| ***Dinogymnium* sp.** |  |  |  |  |  |  |  |  | 1 |  |  |  |  |  |  |  |  |  |  |  |  |  |  |  |  |  |  |  |  |  |  |
| ***Downiesphaeridium? aciculare*** |  | 5 | 1 | 4 | 2 | 7 | 5 | 7 | 9 | 6 | 9 | 3 | 3 | 4 | 3 | 1 |  |  | 3 | 5 | 3 | 4 |  | 5 | 5 | 9 | 9 | 7 | 7 | 8 |  |
| ***Downiesphaeridium armatum*** |  |  | 1 |  |  | 2 |  | 3 |  | 5 | 4 | 5 |  |  |  |  |  |  |  | 2 |  |  |  |  | 5 | 2 |  | 1 |  | 1 |  |
| ***Downiesphaeridium* sp*.*** | 3 | 7 | 6 | 2 | 3 | 7 | 8 | 6 | 8 | 6 | 9 | 9 | 7 | 4 | 3 | 8 | 7 | 9 | 5 | 7 | 9 | 9 | 2 | 8 | 8 | 5 | 3 | 7 | 8 | 9 | 4 |
| ***Ellipsoidictyum* cf*. reticulatum*** |  |  |  |  |  |  |  |  |  | 1 |  |  |  |  |  |  |  | 2 |  |  |  |  |  |  |  |  |  |  |  |  |  |
| ***Elytrocysta druggii*** |  |  | 3 | 2 | 3 | 3 | 2 | 4 |  | 3 | 3 | 4 | 6 | 2 | 3 | 4 | 8 | 4 | 6 | 4 | 2 |  | 4 | 2 |  | 1 |  | 2 | 1 | 2 |  |
| ***Eucladinium* sp*.*** |  | 2 |  |  |  |  |  |  |  |  |  |  |  |  |  |  |  |  |  |  |  |  |  |  |  |  |  |  |  |  |  |
| ***Eurydinium ingramii*** |  |  | 1 | 2 |  | 1 | 1 | 1 | 2 |  |  |  | 3 |  |  |  |  |  |  |  |  |  |  | 1 |  |  |  |  | 1 |  |  |
| ***Eurydinium* sp.** |  | 1 | 1 |  |  | 1 |  | 1 | 1 |  |  |  |  |  | 1 |  |  |  |  |  |  |  |  | 3 | 1 |  |  |  |  |  |  |
| ***Exochosphaeridium bifidium*** | 4 | 1 | 1 | 3 | 5 | 7 |  | 5 | 2 | 6 | 7 | 1 | 2 | 4 | 1 | 2 | 2 | 5 |  |  |  | 3 | 1 | 6 | 6 | 2 | 8 | 3 | 3 |  |  |
| ***Exochosphaeridium muelleri*** |  | 2 |  | 2 |  | 5 |  | 3 |  |  |  | 2 | 2 |  | 1 |  |  |  | 1 | 2 |  |  | 3 | 2 | 2 | 2 | 3 |  | 1 |  |  |
| ***Exochosphaeridium* cf*. arnace*** |  |  |  |  |  |  |  |  |  |  |  |  |  |  |  | 1 |  | 2 |  |  |  |  |  |  |  |  |  |  |  |  |  |
| ***Exochosphaeridium phragmites*** | 1 | 2 | 2 | 2 | 2 | 1 |  |  | 2 | 3 | 3 | 5 | 2 | 1 | 2 | 3 |  |  |  |  |  | 4 |  | 2 | 3 | 2 | 1 |  | 2 |  |  |
| ***Florentinia aculeata*** |  |  |  |  |  |  | 1 |  |  |  |  |  |  |  |  |  |  |  |  |  |  |  |  |  | 1 |  |  |  |  |  |  |
| ***Florentinia berran*** | 1 |  |  |  | 1 | 1 |  |  | 1 |  | 2 |  | 2 |  | 2 |  | 1 | 3 | 2 | 4 |  | 2 | 1 | 2 | 3 | 3 | 2 |  | 1 |  |  |
| ***Florentinia* cf. *berran*** |  |  |  |  |  | 1 | 1 | 1 |  |  | 1 |  |  |  |  |  |  |  |  |  |  |  |  | 2 | 2 | 1 |  | 2 |  |  |  |
| ***Florentinia cooksoniae*** |  |  |  |  |  |  |  |  |  |  |  |  |  | 2 |  | 1 |  |  |  |  |  |  |  | 1 |  | 1 |  |  |  |  |  |
| ***Florentinia* cf*. cooksoniae*** |  |  | 1 |  |  |  |  |  |  |  |  |  |  |  |  |  |  |  |  | 1 |  |  |  |  |  |  | 1 |  |  |  |  |
| ***Florentinia laciniata*** |  |  | 1 |  |  | 1 |  | 1 | 1 |  |  |  |  |  |  |  |  | 1 |  |  |  |  |  |  | 1 | 2 |  | 3 |  |  |  |
| ***Florentinia radiculata*** |  |  |  |  |  |  |  |  |  | 1 |  |  |  |  |  |  |  |  |  |  |  |  |  | 1 |  |  |  |  |  |  |  |
| ***Geiselodinium geiseltalense*** |  | 1 | 1 | 1 |  |  | 2 |  | 1 | 4 |  | 3 |  | 3 | 2 |  |  |  |  | 1 | 2 | 2 |  | 2 | 3 | 3 | 2 |  |  | 1 |  |
| ***Gramocysta verricula*** |  |  |  |  |  |  |  |  |  |  |  |  |  |  |  |  |  |  | 1 |  |  |  |  |  |  |  |  |  |  |  |  |
| ***Heterosphaeridium cordiforme*** | 2 |  | 2 | 7 | 3 | 7 | 9 | 3 | 1 |  | 6 | 3 |  |  | 2 |  | 1 | 3 | 1 | 2 | 3 | 4 | 3 | 4 | 6 | 8 | 6 | 9 | 6 | 5 |  |
| ***Heterosphaeridium verdieri*** |  | 3 | 1 | 3 | 1 | 4 | 4 | 3 |  | 1 | 4 | 1 |  | 1 |  |  | 1 |  | 2 | 1 |  |  |  | 3 |  | 1 | 2 | 1 | 4 | 1 |  |
| ***Heterosphaeridium* sp*.*** | 1 | 4 |  | 1 | 2 | 4 | 4 | 4 | 3 | 5 | 5 | 2 |  | 2 | 1 | 4 | 3 | 2 | 1 |  | 4 | 2 |  | 3 | 5 | 4 | 3 | 5 | 5 | 5 | 2 |
| ***Hystrichodinium isodiametricum*** |  |  |  |  |  |  |  |  |  |  |  |  |  | 1 |  |  |  |  |  |  |  |  |  |  | 1 |  | 1 |  |  |  |  |
| ***Hystrichodinium pulchrum*** |  |  |  |  |  |  |  |  |  |  | 9 | 4 |  | 3 | 1 |  |  | 6 | 3 |  |  |  | 4 |  | 4 | 1 |  | 1 | 1 |  |  |
| ***Hystrichogonyaulax* cf*. polytrix*** |  |  |  |  |  |  |  |  |  |  |  |  | 1 |  | 1 |  |  |  |  |  |  |  |  |  |  |  |  |  |  |  |  |
| ***Hystrichosphaeridium recurvatum*** |  |  |  |  | 1 |  |  |  |  |  |  | 1 | 2 |  |  |  |  |  | 1 | 1 |  | 3 |  |  |  |  |  |  |  |  |  |
| ***Hystrichosphaeridium tubiferum*** | 2 |  |  | 1 | 1 |  |  |  |  |  |  | 1 |  |  |  |  |  |  |  |  |  | 1 |  |  |  |  |  |  |  |  |  |
| [***Hystrichosphaerina***](http://dinoflaj.smu.ca/dinoflaj3/index.php/Hystrichosphaerina_schindewolfii) ***schindewolfi*** |  | 1 |  | 2 | 4 |  |  |  |  | 1 |  | 1 |  |  |  |  |  | 1 |  |  |  |  |  |  |  |  |  |  |  |  |  |
| ***Hystrichostrogylon membraniphorum*** |  | 1 |  |  | 1 | 1 |  |  |  |  |  |  |  |  |  | 1 | 1 |  |  |  |  |  |  |  |  |  |  | 1 |  |  |  |
| ***Impagidinium dispertitum*** |  |  |  |  |  |  |  |  |  |  |  |  | 1 |  | 1 |  |  |  |  |  |  |  |  |  |  |  |  |  | 1 |  |  |
| ***Impagidinium ovum*** |  |  |  |  | 1 |  |  |  |  | 2 |  | 1 | 1 |  |  |  |  |  | 1 |  |  |  |  | 1 |  | 1 |  |  |  |  |  |
| ***Isabelidinium acuminatum*** | 7 | 2 | 8 | 4 | 3 |  | 2 | 1 |  |  |  |  |  |  |  |  |  |  |  |  |  |  |  |  |  |  |  |  |  |  |  |
| ***Isabelidinium belfastense*** | 6 | 5 | 1 |  |  |  |  |  |  |  |  |  |  |  |  |  |  |  |  |  |  |  |  |  |  |  |  |  |  |  |  |
| ***Isabelidinium cooksoniae*** |  |  |  | 1 |  |  |  |  |  |  |  |  |  |  | 1 |  |  | 1 |  | 1 |  |  |  |  |  |  |  |  |  |  |  |
| ***Isabelidinium weidichii*** |  |  | 2 |  |  |  |  |  |  |  |  |  |  |  |  |  |  |  |  |  |  |  |  |  |  |  |  |  |  |  |  |
| ***Isabelidinium* sp.** | 2 | 1 | 4 | 1 |  |  | 1 | 2 |  |  |  | 1 |  | 1 |  |  |  |  | 3 |  |  | 1 | 1 | 2 | 1 |  |  |  | 1 |  |  |
| ***Kleithriasphaeridium loffrense*** |  |  |  |  |  |  |  |  |  |  |  |  |  | 1 | 1 |  |  |  |  |  |  |  |  |  |  |  |  |  |  |  |  |
| ***Kleithriasphaeridium readei*** | 1 |  |  |  |  |  |  |  |  |  |  |  |  |  |  |  |  |  |  |  | 1 |  |  |  |  |  |  |  |  |  |  |
| ***Laciniadinium orbiculatum*** | 1 | 1 |  |  |  |  |  |  | 1 | 2 |  |  | 3 | 4 |  |  |  |  |  | 1 |  |  |  | 1 | 2 |  | 1 |  |  | 1 |  |
| ***Lejeunecysta hyalina*** |  |  |  |  |  |  | 1 |  |  |  |  |  |  | 1 | 1 |  |  |  |  |  |  | 1 |  | 1 |  | 1 |  |  |  |  |  |
| ***Lejeunecysta* sp*.*** |  |  |  |  |  |  | 2 |  |  |  |  |  |  | 2 |  |  | 1 |  |  |  |  | 1 |  | 2 |  |  |  |  |  |  |  |
| ***Levisphaera* cf*. crassicingulata*** | 3 |  | 2 |  |  |  | 2 |  | 2 |  | 2 | 2 | 2 | 3 | 1 |  |  |  | 1 |  | 2 |  |  |  |  |  |  | 1 |  | 2 |  |
| ***Manumiella cretacea*** | 2 |  |  |  |  |  |  |  |  |  |  |  |  |  |  |  |  |  |  |  |  |  |  |  |  |  |  |  |  |  |  |
| ***Manumiella* sp.** |  |  | 1 |  |  |  |  |  |  |  |  |  |  |  |  |  |  |  |  |  |  |  |  |  |  |  |  |  |  |  |  |
| ***Montanarocysta aemiliana*** |  |  |  |  | 2 | 1 |  |  | 2 | 3 |  |  |  |  | 1 | 8 |  |  |  |  |  |  | 1 |  |  |  |  |  | 1 |  |  |
| ***Nelsoniella aceras*** |  |  |  | 1 |  | 1 |  | 2 |  |  |  |  |  |  |  |  |  |  |  |  |  |  |  |  |  |  |  |  |  |  |  |
| ***Nelsoniella tuberculata*** |  |  |  | 1 |  | 1 |  |  |  |  |  |  |  |  |  |  |  |  |  |  |  |  |  |  |  |  |  |  |  |  |  |
| ***Nelsoniella* sp.** |  |  |  |  |  | 1 |  |  |  |  |  |  |  |  |  |  |  |  |  |  |  |  |  |  |  |  |  |  |  |  |  |
| ***Nematosphaeropsis? philippotii*** |  |  |  |  |  |  |  |  |  |  |  |  | 1 |  |  |  |  |  |  |  |  |  |  |  |  |  |  |  |  |  |  |
| ***Odontochitina operaulata*** | 1 | 1 |  |  |  |  |  |  |  |  |  |  |  |  |  |  |  |  |  |  |  |  |  |  |  |  |  |  |  |  |  |
| ***Odontochitina porifera*** |  |  | 1 | 3 |  |  |  |  |  |  |  |  |  |  |  |  |  |  |  |  |  |  |  |  |  |  |  |  |  |  |  |
| ***Odontochitina* sp.** |  | 2 |  |  |  |  | 1 |  |  |  |  |  |  |  |  |  |  |  |  |  |  |  |  |  |  |  |  |  |  |  |  |
| ***Oligosphaeridium complex*** | 1 | 1 |  |  | 1 |  |  | 1 |  | 2 |  |  | 2 | 2 | 1 | 3 | 2 | 3 | 8 | 3 |  | 1 | 1 |  | 1 | 1 |  |  |  |  |  |
| ***Oligosphaeridium poculum*** | 1 | 1 |  |  | 1 |  |  |  |  |  |  |  | 1 |  |  |  |  |  |  | 2 |  | 3 |  |  |  |  |  |  |  |  |  |
| ***Oligosphaeridium pulcherrimum*** | 1 |  |  |  |  |  |  |  |  |  |  |  |  |  | 2 | 3 |  |  | 2 |  |  | 1 |  |  |  |  |  |  |  |  |  |
| ***Oligosphaeridium* sp.** | 1 |  |  |  |  |  | 1 | 1 |  |  |  |  |  |  |  | 2 | 1 |  |  | 1 | 2 |  |  | 1 |  |  |  |  |  |  |  |
| ***Operculodinium centrocarpum*** |  |  | 1 |  | 1 |  |  |  |  |  |  |  | 1 | 1 | 1 |  |  | 1 |  | 1 |  | 1 | 1 |  | 1 |  |  |  |  | 2 |  |
| ***Palaeocystodinium* spp.** |  | 1 |  |  |  |  |  |  |  |  |  |  |  | 1 |  |  |  |  |  |  |  |  |  |  |  |  |  |  |  |  |  |
| ***Palaeohystrichophora infusorioides*** | 1 | 1 | 1 | 1 | 2 | 9 |  | 1 | 1 |  | 1 |  |  |  |  |  |  |  |  |  |  |  |  |  |  | 1 | 1 | 1 |  |  |  |
| ***Palaeohystrichophora* sp.** |  |  | 1 | 1 | 1 | 2 |  | 1 |  | 1 |  | 1 | 1 | 1 |  |  |  |  |  |  | 1 |  |  |  |  | 1 |  | 1 | 1 | 1 |  |
| ***Paralecaniella indentata*** |  |  |  |  |  | 1 |  |  |  |  |  |  |  |  |  |  | 1 |  |  |  |  | 1 |  |  |  | 1 |  |  |  |  |  |
| ***Parvulodinium calvatum*** |  |  |  |  |  |  |  |  |  |  |  |  |  |  |  |  |  |  |  |  |  | 1 |  |  |  |  |  |  |  |  |  |
| ***Pervosphaeridium truncatum*** | 1 |  |  |  |  |  | 1 | 1 |  |  |  |  |  |  |  |  |  |  |  |  |  |  |  |  |  |  | 1 |  |  |  |  |
| ***Pervosphaeridium pseudhystrichodinium*** |  |  |  | 3 |  |  |  | 3 |  |  |  | 1 | 3 | 3 | 1 | 2 |  | 3 |  | 4 |  | 3 | 3 | 3 |  | 1 | 3 | 2 | 1 |  |  |
| ***Pervosphaeridium* sp*.*** |  | 1 | 2 |  |  |  |  |  |  |  |  | 2 |  | 1 |  | 2 |  | 4 | 2 | 2 | 2 | 1 | 3 | 2 |  | 2 |  |  | 1 |  |  |
| ***Pierceites* sp.** |  | 1 |  |  |  |  |  | 1 | 1 |  |  |  | 1 | 1 |  |  | 1 |  |  | 1 |  |  | 1 |  | 2 |  |  | 2 | 1 |  |  |
| ***Polysphaeridium* sp*.*** |  |  | 3 |  | 1 |  |  |  |  |  | 3 | 2 |  |  |  |  |  |  |  |  | 1 |  | 1 |  |  |  |  |  |  |  |  |
| ***Prolixosphaeridium granulosum*** |  |  |  |  |  |  |  |  |  |  |  |  |  |  |  |  |  |  |  |  |  |  |  |  | 1 | 1 | 1 |  |  |  |  |
| ***Prolixosphaeridium parvispinum*** |  |  |  |  |  |  | 1 | 2 |  | 1 |  | 2 |  | 4 | 2 |  |  | 1 |  |  |  | 3 | 2 | 1 | 2 | 1 | 3 | 2 |  |  |  |
| ***Pseudoceratium* sp.** |  |  |  |  |  |  |  |  |  |  |  |  | 1 |  |  |  |  |  |  |  |  |  |  |  |  |  |  |  |  |  |  |
| ***Pterodinium cingulatum*** | 1 |  | 1 |  |  |  |  |  |  |  |  |  |  |  |  |  |  |  |  |  |  |  |  |  |  |  |  |  |  |  |  |
| ***Pyxidinopsis* spp.** |  |  | 1 | 4 |  |  |  |  |  |  |  | 2 |  | 3 | 1 |  |  |  |  |  |  |  |  |  | 2 | 1 | 1 | 2 | 1 | 1 |  |
| ***Raetiaedinium truncigerum*** |  |  |  | 1 |  |  |  |  |  | 1 |  |  |  |  |  |  |  |  |  |  |  |  |  |  |  |  |  |  | 1 |  |  |
| ***Saeptodinium gravattensis*** |  | 2 | 4 | 1 |  |  | 2 | 6 | 2 | 6 | 5 | 5 | 1 | 6 |  |  |  |  |  |  |  | 2 | 1 | 1 | 1 | 4 | 1 | 2 |  |  |  |
| ***Satyrodinium haumuriense*** | 6 | 9 | 2 | 1 |  |  |  |  |  |  |  |  |  |  |  |  |  |  |  |  |  |  |  |  |  |  |  |  |  |  |  |
| ***Scriniodinium* cf*. irregularum*** |  |  |  |  |  |  |  |  |  |  |  |  |  |  |  |  |  |  |  |  |  |  | 1 |  |  |  |  |  |  |  |  |
| ***Senegalinium? asymmetricum*** |  | 1 |  |  |  |  |  |  |  |  |  |  |  |  |  |  |  |  |  |  |  |  |  |  |  |  |  |  |  |  |  |
| ***Senegalinium bicavatum*** |  |  |  |  |  |  |  |  |  |  |  |  |  |  |  |  |  |  |  |  |  |  |  |  |  |  |  |  | 1 |  |  |
| ***Senoniasphaera rotundata*** |  |  |  |  |  |  |  |  | 2 |  |  |  | 1 | 2 |  |  |  |  | 3 |  |  |  |  |  |  |  |  |  |  |  |  |
| ***Senoniasphaera* sp.** |  |  |  |  |  | 1 |  |  |  |  |  |  | 2 | 4 | 2 |  |  |  |  |  |  |  |  |  |  |  |  |  |  |  |  |
| ***Spinidinium echinoideum*** |  |  |  |  |  |  |  |  |  |  |  |  |  |  |  | 1 |  |  | 2 |  |  |  |  |  |  | 2 |  |  |  |  |  |
| ***Spinidinium* sp.** |  |  |  |  |  |  |  |  |  |  |  |  |  |  |  |  |  |  |  |  |  |  |  |  | 1 |  |  | 2 |  |  |  |
| ***Spiniferites* cf. *bulloideus*** | 1 |  |  |  |  |  | 2 |  |  | 2 | 4 | 3 | 1 | 4 | 2 | 1 | 3 | 2 | 2 | 3 |  | 4 | 2 |  | 2 | 1 | 2 | 2 | 2 |  |  |
| ***Spiniferites membranaceus*** |  |  |  |  | 1 | 1 |  | 1 | 1 |  | 1 | 1 |  | 1 |  | 2 | 1 |  | 3 | 1 |  |  |  | 1 |  |  | 1 | 2 |  |  |  |
| ***Spiniferites ramosus*** | 2 | 1 | 2 | 5 | 6 | 7 | 2 | 6 | 4 | 9 | 9 | 6 | 5 | 5 | 4 | 9 | 8 | 8 | 6 | 4 |  | 8 | 9 | 4 | 9 | 8 | 7 | 5 | 3 | 1 |  |
| ***Spiniferites multibrevis*** | 1 |  | 1 | 1 |  |  |  |  |  |  |  | 1 |  |  |  |  | 1 |  |  |  |  | 1 | 3 |  | 1 | 2 | 2 |  |  |  |  |
| ***Spiniferites* sp.** | 2 | 4 | 4 | 4 | 4 | 5 | 1 | 5 | 3 | 5 | 9 | 8 | 3 | 4 | 2 | 2 | 6 | 6 | 3 | 4 | 4 | 3 | 2 | 4 | 5 | 3 | 5 | 5 | 5 | 2 |  |
| ***Subtilisphaera perlucida*** |  |  |  |  |  |  |  |  |  | 1 |  | 1 |  |  | 1 | 1 | 1 | 2 |  |  |  | 1 | 1 |  |  | 1 |  |  | 1 | 1 |  |
| ***Subtilisphaera pontis-mariae*** |  |  |  |  |  |  |  |  |  |  |  |  |  |  |  |  |  |  |  |  |  |  |  | 1 | 1 |  |  |  |  |  |  |
| ***Subtilisphaera terrula*** |  |  |  |  |  |  |  | 1 |  |  |  |  |  | 2 |  |  |  | 1 | 1 |  |  | 2 |  | 4 |  |  |  |  |  |  |  |
| ***Subtilisphaera senegalensis*** |  |  |  |  |  |  |  |  | 3 | 3 | 2 |  |  | 6 |  |  |  |  | 1 |  |  |  |  |  | 1 | 1 |  | 2 |  |  |  |
| ***Subtilisphaera* sp.** | 2 | 3 | 1 | 1 |  | 1 | 1 |  | 5 | 3 | 1 |  | 4 | 6 | 8 | 6 | 3 | 1 | 2 | 6 | 9 | 7 | 7 | 8 | 2 | 3 | 3 | 4 | 3 | 5 |  |
| ***Surculosphaeridium? cassospinum*** |  |  |  |  |  | 2 | 1 | 2 |  |  |  |  |  |  |  |  |  |  |  |  |  |  |  |  | 1 |  |  |  |  |  |  |
| ***Surculosphaeridium? longifurcatum*** |  |  |  |  |  |  |  |  |  |  |  |  |  | 1 |  | 3 |  | 1 | 4 |  | 2 | 5 | 3 | 1 | 3 | 2 | 1 | 2 | 3 | 3 |  |
| ***Surculosphaeridium? basifurcatum*** |  |  |  |  |  |  |  | 4 |  |  |  |  | 1 | 3 |  | 1 |  | 3 | 4 | 1 |  | 4 |  |  | 1 | 1 |  |  |  |  |  |
| ***Surculosphaeridium suggestium*** |  |  |  |  |  |  |  |  |  |  |  |  |  |  |  |  |  |  |  |  |  |  | 3 |  |  |  |  |  |  |  |  |
| ***Surculosphaeridium* sp.** | 2 |  | 4 | 1 | 4 | 5 | 4 | 5 | 3 | 3 | 1 |  |  |  | 1 |  | 1 |  |  |  |  | 1 |  |  |  |  | 1 | 1 |  |  |  |
| ***Systematophora areolata*** |  |  |  |  |  | 1 | 1 |  | 2 |  | 1 | 2 |  |  | 1 | 1 |  |  |  | 6 |  |  |  |  | 1 |  | 3 | 1 |  | 1 |  |
| ***Systematophora* sp*.*** |  |  | 1 |  |  |  |  |  |  |  |  |  |  |  |  |  |  |  |  |  | 2 |  |  |  |  |  |  |  |  |  |  |
| ***Tanyosphaeridium variecalamus*** |  |  |  |  |  |  |  |  |  |  |  |  |  |  |  |  | 1 |  |  |  |  |  |  |  |  |  |  |  |  |  |  |
| ***Tanyosphaeridium* cf*. xanthiopyxides*** |  |  |  |  |  |  |  |  |  |  |  |  |  |  |  |  |  |  |  |  |  | 1 |  |  |  |  |  |  |  |  |  |
| ***Tanyosphaeridium* sp*.*** |  |  |  |  |  |  |  |  |  |  |  |  |  |  |  |  | 1 |  |  |  |  |  |  |  |  |  |  |  |  |  |  |
| ***Teneridinium magnoides*** |  |  | 2 |  |  |  |  |  |  |  |  |  | 1 |  | 1 |  | 1 |  |  |  |  | 1 | 1 | 3 | 1 | 1 |  |  |  |  |  |
| ***Tenua hystrix*** | 1 | 1 |  | 1 | 4 | 4 | 3 |  | 4 | 4 | 4 | 3 | 3 | 2 | 6 | 3 |  |  |  | 2 | 3 |  | 1 | 1 | 5 | 2 | 2 | 2 |  | 7 | 2 |
| ***Thalassiphora microperforata*** |  |  |  | 1 |  |  |  |  | 1 |  |  |  |  |  |  | 3 |  |  | 2 |  |  |  |  |  |  |  | 1 |  |  |  |  |
| ***Thalassiphora pelagica*** |  |  |  |  |  |  |  |  | 1 |  | 1 |  |  |  |  | 2 | 1 | 1 |  |  |  | 1 | 2 | 1 |  |  | 1 | 2 |  |  |  |
| ***Thalassiphora* sp.** |  |  |  | 1 |  |  |  |  |  |  |  |  |  |  |  | 1 |  |  |  | 2 |  | 1 | 2 | 3 |  | 1 |  | 1 | 2 | 1 |  |
| ***Trichodinium castanea*** | 3 | 3 | 6 | 5 | 8 | 8 | 4 | 5 | 5 | 9 | 9 | 5 | 4 | 4 | 2 | 4 | 4 | 4 | 7 | 3 | 3 | 3 | 5 |  | 8 | 8 | 6 | 9 | 6 | 9 | 4 |
| ***Trithyrodinium* cf*. evittii*** |  |  |  |  |  |  |  |  |  |  |  |  |  |  | 1 |  |  |  |  |  |  |  | 2 | 2 |  |  |  |  |  |  |  |
| ***Trithyrodinium suspectum*** |  |  |  |  |  |  | 3 |  |  | 5 | 1 | 1 | 2 | 2 | 2 |  |  | 3 |  |  |  |  |  |  |  |  |  |  |  |  |  |
| ***Trithyrodinium* sp.** | 1 |  |  |  |  |  | 1 | 1 |  |  |  |  |  | 1 | 1 |  |  | 3 | 4 | 2 |  | 2 | 5 | 1 |  | 1 |  |  | 1 |  |  |
| ***Xenascus ceratioides*** |  |  |  |  |  | 2 |  |  |  | 2 | 1 | 4 | 4 | 2 |  | 2 |  | 1 |  |  |  |  |  |  |  |  |  |  |  |  |  |
| ***Xenascus* cf*. gochtii*** |  | 1 |  |  |  |  |  |  |  |  | 1 |  |  |  |  |  |  |  |  |  |  |  |  |  |  |  |  |  |  |  |  |
| ***Xenascus serjantii*** |  | 2 | 1 |  |  |  |  | 1 |  |  |  |  |  |  |  |  |  |  |  |  |  |  |  |  |  |  |  |  |  |  |  |
| ***Xenascus* sp.** |  | 2 | 1 | 2 |  | 1 |  | 1 |  | 1 |  |  |  |  |  |  |  |  |  |  |  |  |  |  |  |  |  |  |  |  |  |
| ***Xenicodinium densispinosum*** |  |  |  |  |  |  |  |  |  |  |  | 3 |  |  |  |  |  |  |  | 1 |  | 1 |  |  |  |  |  |  |  |  |  |
| ***Xiphophoridium asteriforme*** | 2 |  |  | 1 | 1 |  |  | 2 |  |  | 1 | 3 |  |  |  |  |  |  | 2 |  |  |  |  |  |  |  |  |  |  |  |  |
| **Pollen Grains** | ***Aruacariacites hungaricus*** | 6 | 3 | 2 | 2 | 6 | 1 | 4 | 5 | 2 |  | 2 | 1 | 1 |  | 1 |  | 2 |  |  | 3 |  |  |  | 1 |  |  | 2 |  |  | 1 |  |
| ***Aruacariacites* sp.** | 1 |  | 4 | 5 | 3 |  | 8 | 1 | 1 | 3 |  |  |  |  | 5 | 1 | 2 |  | 2 |  | 2 |  | 1 | 3 | 1 | 2 | 1 | 1 | 2 | 1 |  |
| ***Carpinus subtriangula*** |  |  | 2 |  |  |  |  | 1 |  |  |  |  |  |  |  |  |  |  |  |  |  |  |  |  |  |  |  |  |  |  |  |
| ***Carpinus* sp.** |  |  | 1 |  |  |  |  |  |  |  |  |  |  |  |  |  |  |  |  |  |  |  |  |  |  |  |  |  |  |  |  |
| ***Carya* sp.** |  |  |  |  |  |  | 2 |  |  |  |  |  |  |  |  |  |  |  |  |  |  |  |  |  |  |  |  |  |  |  |  |
| ***Classopollis* sp*.*** |  |  | 1 | 1 |  |  |  |  |  |  |  |  |  |  | 2 |  |  |  | 1 | 1 |  |  | 3 | 1 |  |  |  |  |  |  |  |
| ***Cycadopites* sp.** |  |  | 1 | 1 |  |  |  |  |  |  |  |  |  |  | 1 | 1 | 1 | 2 | 1 |  |  |  |  |  |  |  |  |  |  |  |  |
| ***Dichastopollenite* sp.** | 1 |  |  |  |  |  |  |  |  |  |  |  |  |  |  |  |  | 1 |  | 1 |  |  | 2 |  |  |  |  |  |  |  |  |
| ***Ephedripites* sp.** |  |  |  | 1 |  | 1 |  |  | 1 |  |  |  |  |  |  |  |  |  | 1 |  |  |  |  |  |  |  |  |  |  |  |  |
| ***Eucommiidites* sp.** |  |  |  |  |  |  |  |  |  |  |  |  |  |  | 2 |  | 2 | 1 | 1 |  |  |  |  |  |  |  |  |  |  |  |  |
| ***Foveomonocolpites* sp.** | 1 | 2 | 1 |  |  |  |  |  |  |  |  |  |  |  |  |  |  |  |  |  |  |  |  |  |  |  |  |  |  |  |  |
| ***Foveotricolpites giganteus*** | 1 |  |  |  |  | 1 | 3 |  | 2 | 1 |  |  |  |  |  |  |  |  | 1 | 1 |  |  | 1 |  |  |  |  |  |  |  |  |
| ***Foveotricolpites gigantoreticulatus*** |  |  |  |  |  |  |  |  | 1 |  |  |  |  |  |  |  |  |  |  |  |  |  |  |  |  |  |  |  |  |  |  |
| ***Foveotricolpites* sp.** | 1 | 2 | 1 | 2 |  |  |  | 1 |  |  |  |  |  |  |  |  | 1 |  | 1 |  |  |  |  |  |  |  |  |  |  | 1 |  |
| ***Gemmamonocolpites* sp*.*** | 1 |  |  |  |  |  |  |  |  |  |  |  |  |  |  |  |  |  |  |  |  |  |  |  |  |  |  |  |  |  |  |
| ***Gemmatriporites* sp*.*** | 1 |  |  |  |  |  |  |  |  |  |  |  |  |  |  |  |  |  |  |  |  |  |  |  |  |  |  |  |  |  |  |
| ***Inaperturopollenites* sp*.*** |  |  | 1 |  |  |  |  | 1 |  | 1 |  |  | 2 |  |  | 1 | 1 | 1 | 2 |  |  | 1 | 3 | 2 |  |  |  |  |  |  |  |
| ***Liliacidites* cf*. regularis*** |  |  |  |  |  |  |  |  |  |  |  |  |  |  |  |  |  |  |  |  |  |  |  | 1 |  |  |  |  |  |  |  |
| ***Liliacidites intermedius*** |  |  |  |  |  |  |  |  |  |  |  |  |  | 1 |  |  |  |  |  |  |  |  |  |  |  |  |  |  |  |  |  |
| ***Liliacidites* sp.** | 3 |  | 4 |  |  |  | 1 |  |  |  |  |  |  |  |  |  |  |  |  |  |  |  |  |  |  |  |  |  |  |  |  |
| ***Retimonocolpites variplicatus*** |  |  |  |  |  |  |  |  |  |  |  |  |  |  |  |  |  |  |  |  |  |  | 1 | 1 |  |  |  |  |  |  |  |
| ***Retimonocolpites* sp*.*** |  |  |  | 1 |  |  |  |  |  |  |  |  | 1 |  |  |  |  |  |  |  |  |  |  |  |  |  |  |  |  |  |  |
| ***Rousea* sp.** |  | 1 |  |  |  |  |  |  |  |  |  |  |  |  |  |  |  |  |  |  |  |  | 1 | 1 |  |  |  |  |  |  |  |
| ***Spheripollenites psilatus*** | 2 |  |  |  |  |  | 2 |  |  |  |  |  |  |  |  |  | 2 | 1 |  | 1 |  | 1 |  | 1 |  |  |  | 1 |  |  |  |
| ***Spheripollenites* sp.** | 2 |  | 2 |  |  |  | 2 |  | 1 |  | 1 |  |  |  |  | 2 |  |  |  |  |  |  | 1 |  |  |  |  |  |  | 1 | 2 |
| ***Tricolpites* spp*.*** | 2 | 3 | 3 | 2 |  | 1 |  | 1 | 1 | 1 | 1 |  | 2 |  | 1 |  |  | 1 | 2 |  | 1 | 1 | 3 |  |  |  |  |  | 2 | 1 |  |
| **Spores** | ***Biretisporites* sp.** |  |  |  |  |  |  |  |  |  |  |  |  |  |  | 1 |  |  |  |  |  |  |  |  |  |  |  |  |  |  |  |  |
| ***Cicatricosisporites* sp*.*** |  |  |  |  |  |  |  |  |  |  |  |  |  |  |  |  |  |  | 1 |  |  |  |  |  |  |  |  |  |  |  |  |
| ***Cyathidites australis*** | 1 | 1 |  | 1 |  |  | 1 | 3 |  |  |  |  |  |  |  |  |  |  |  |  | 2 |  |  |  |  |  |  |  | 1 |  |  |
| ***Cyathidites* sp.** |  | 2 |  |  |  |  |  |  |  |  |  | 1 |  |  |  |  | 1 |  |  |  |  |  |  |  |  |  |  |  |  |  |  |
| ***Deltoidospora diaphana*** |  |  |  |  |  |  |  |  |  |  |  |  |  |  |  |  |  | 1 |  |  |  |  |  |  |  |  |  |  |  |  |  |
| ***Deltoidospora minor*** | 2 | 1 | 4 |  |  |  | 2 |  | 2 | 1 |  |  |  |  | 3 |  |  |  |  | 1 |  |  | 1 |  |  |  |  |  |  |  |  |
| ***Deltoidospora* sp.** | 2 |  | 2 |  |  | 1 |  |  | 2 |  |  |  |  |  | 1 |  | 3 | 1 |  |  |  |  | 1 |  |  |  |  |  |  |  |  |
| ***Gabonisporis* sp.** |  |  |  |  |  |  |  |  | 1 |  |  |  |  |  |  |  |  |  |  |  |  |  |  |  |  |  |  |  |  |  |  |
| ***Laevigatosporites ovatus*** |  |  | 1 |  |  |  |  |  |  |  |  |  |  |  |  |  | 1 |  | 1 |  |  |  | 2 | 3 |  |  |  |  |  |  |  |
| ***Microfoveolatosporis* sp.** |  |  |  |  |  |  | 1 |  |  |  |  |  |  |  |  |  |  |  |  |  |  |  |  |  |  |  |  |  |  |  |  |
| ***Stellatopollis dejaxii*** |  |  |  |  |  |  |  |  |  |  |  |  |  |  |  |  | 1 |  |  |  |  |  |  |  |  |  |  |  |  |  |  |
| ***Todisporites minor*** |  |  |  |  |  |  |  |  |  |  |  |  |  |  | 1 |  |  |  |  |  |  |  |  |  |  |  |  |  |  |  |  |
| ***Triplanosporites* sp.** |  |  |  |  |  |  |  |  |  |  |  |  |  |  |  |  |  |  |  | 1 |  |  | 1 |  |  |  |  | 1 |  |  |  |
| ***Triporoletes reticulatus*** | 1 |  |  |  | 1 |  |  |  |  |  |  |  |  |  |  |  |  |  |  |  |  |  |  |  |  |  |  |  |  |  |  |
| ***Undulatisporites* sp.** |  |  |  | 1 |  |  |  |  |  |  |  |  |  |  |  |  |  |  |  |  |  |  |  |  |  |  |  |  |  |  |  |
| ***Verrucosisporites* sp.** |  |  |  | 1 |  |  |  |  |  |  |  |  |  |  |  |  |  |  |  |  |  |  |  |  |  |  |  |  |  |  |  |
| **FWA** | ***Crassosphaera ornata*** |  |  | 1 |  |  |  | 1 |  | 3 |  |  |  | 2 |  |  |  |  |  | 1 |  |  |  | 2 | 2 |  |  |  |  | 1 |  |  |
| ***Ovoidites parvus*** | 2 |  |  |  |  |  |  |  |  |  |  |  |  |  | 2 |  |  |  |  |  |  |  |  |  |  |  | 1 |  |  |  |  |
| ***Pediasstrum boryanum*** | 3 |  | 2 | 26 | 28 | 3 | 3 |  |  | 3 | 3 |  | 4 | 2 | 16 |  | 39 |  |  | 1 | 1 |  | 2 | 1 | 10 | 3 | 3 | 1 | 2 |  |  |
| ***Pediasstrum* sp*.*** | 4 | 2 | 2 | 18 | 7 |  |  |  | 1 |  | 1 | 1 | 4 | 1 | 17 | 3 | 18 | 5 | 3 |  | 1 |  | 4 | 5 | 8 | 8 | 4 | 5 | 1 | 1 |  |
| ***Scenedesmus* spp*.*** |  |  |  | 3 | 4 |  | 1 |  |  |  |  |  |  |  |  |  |  |  |  |  | 1 |  |  |  | 1 |  |  |  |  | 2 |  |
| **Acritarchs** | ***Fromea amphora*** |  |  | 1 |  |  |  |  |  |  |  |  |  | 2 | 1 | 2 |  |  |  | 1 |  |  |  |  |  |  |  | 1 |  |  |  |  |
| ***Fromea fragilis*** |  | 2 | 2 |  |  |  |  |  |  | 3 |  |  | 2 | 1 |  |  | 6 | 6 | 3 | 4 | 3 | 1 | 2 | 1 |  |  |  |  |  | 1 |  |
| ***Fromea nicosia*** |  |  |  |  |  |  |  |  |  |  | 1 |  |  |  |  | 1 |  |  |  |  |  |  |  |  |  |  |  |  |  |  |  |
| ***Fromea* sp.** |  |  |  |  |  |  |  |  | 1 | 1 |  | 1 | 1 |  | 1 |  | 3 |  | 1 | 2 |  |  | 1 | 1 |  |  | 2 |  |  |  |  |
| ***Lophosphaeridia* spp*.*** | 3 |  | 2 |  |  | 1 | 1 |  | 2 |  | 2 |  |  | 1 |  | 2 | 4 | 2 | 4 |  |  |  | 1 |  | 2 |  |  | 1 |  |  |  |
| ***Leiosphaeridia* spp*.*** | 4 | 3 | 3 | 3 | 1 | 1 | 2 | 2 | 4 | 3 |  | 3 | 2 | 1 | 5 | 2 | 3 | 3 | 4 | 3 | 2 | 1 | 3 | 2 |  |  | 6 | 1 | 2 | 1 |  |
| ***Micrhystridium* spp.** |  | 1 | 1 |  |  |  | 1 | 1 | 2 | 3 |  |  |  |  |  |  |  |  |  |  |  |  |  |  |  |  |  |  | 1 | 2 |  |
| **Prasinophytes** | ***Granodiscus* sp.** | 1 |  | 1 | 1 |  | 1 |  | 1 | 1 |  |  |  |  |  |  |  |  |  |  |  |  |  |  |  |  |  |  |  | 1 |  |  |
| ***Lancettopsis* sp.** |  |  |  |  |  |  |  |  |  |  |  |  |  |  | 2 | 1 |  | 2 |  |  |  |  |  | 1 |  |  |  |  |  |  |  |
| ***Pterospermella australiensis*** |  |  | 1 |  |  |  |  | 1 |  | 1 | 1 |  | 1 |  |  |  |  | 1 |  |  |  |  |  |  |  |  |  |  |  |  |  |
| ***Schizosporis laevigatus*** | 1 |  |  |  |  |  |  |  |  |  |  |  |  |  |  |  |  |  |  |  |  |  |  |  |  |  |  |  |  |  |  |
| ***Schizosporis reticulatus*** |  |  | 1 |  |  |  |  |  |  | 1 |  |  |  |  |  |  |  |  |  |  |  |  |  |  |  |  |  |  |  |  |  |
| ***Tasmanites* sp.** | 4 | 2 | 4 |  |  |  |  |  | 1 | 1 |  |  | 1 | 1 | 2 |  |  |  |  | 2 |  |  |  |  |  |  |  |  |  |  |  |
| **MFTLs** | | 60 | 52 | 30 | 77 | 69 | 63 | 62 | 77 | 65 | 50 | 73 | 68 | 71 | 57 | 47 | 96 | 26 | 64 | 48 | 51 | 31 | 71 | 50 | 32 | 50 | 59 | 64 | 69 | 57 | 86 | 46 |
| **Total number of species** | | 69 | 60 | 83 | 62 | 45 | 55 | 56 | 57 | 61 | 57 | 49 | 55 | 58 | 66 | 70 | 49 | 54 | 57 | 62 | 60 | 33 | 54 | 66 | 68 | 52 | 56 | 50 | 51 | 53 | 43 | 6 |
